# Supplementary material for: Metagenomic Insights of the Root Colonizing Microbiome Associated with Symptomatic and Non-Symptomatic Bananas in Fusarium Wilt Infected Fields
Source: PubMed Central journal article supplement (PMC7076721; doi:10.3390/plants9020263), 2020-02-18
Supplement: plants-09-00263-s001.pdf [file plants-09-00263-s001.pdf]

**Title: Metagenomic insights of the root colonizing microbiome associated with symptomatic and non-symptomatic bananas in *Fusarium* wilt infected fields**

Manoj Kaushal<sup>1</sup>, George Mahuku<sup>1</sup>, Rony Swennen<sup>2,3,4</sup>

<sup>1</sup>International Institute of Tropical Agriculture (IITA), Mikocheni B, Dar es Salaam -34441, Tanzania. <sup>2</sup>Bioversity International, Willem De Croylaan 42, B-3001 Leuven, Belgium

<sup>3</sup>Laboratory of Tropical Crop Improvement, Division of Crop Biotechnics, KU Leuven, B-3001 Leuven, Belgium

<sup>4</sup>International Institute of Tropical Agriculture. c/o The Nelson Mandela African Institution of Science and Technology (NM-AIST), P.O. Box 447, Arusha, Tanzania

Corresponding author email: [M.kaushal@cgiar.org](mailto:M.kaushal@cgiar.org)

**Supplementary Figures:**

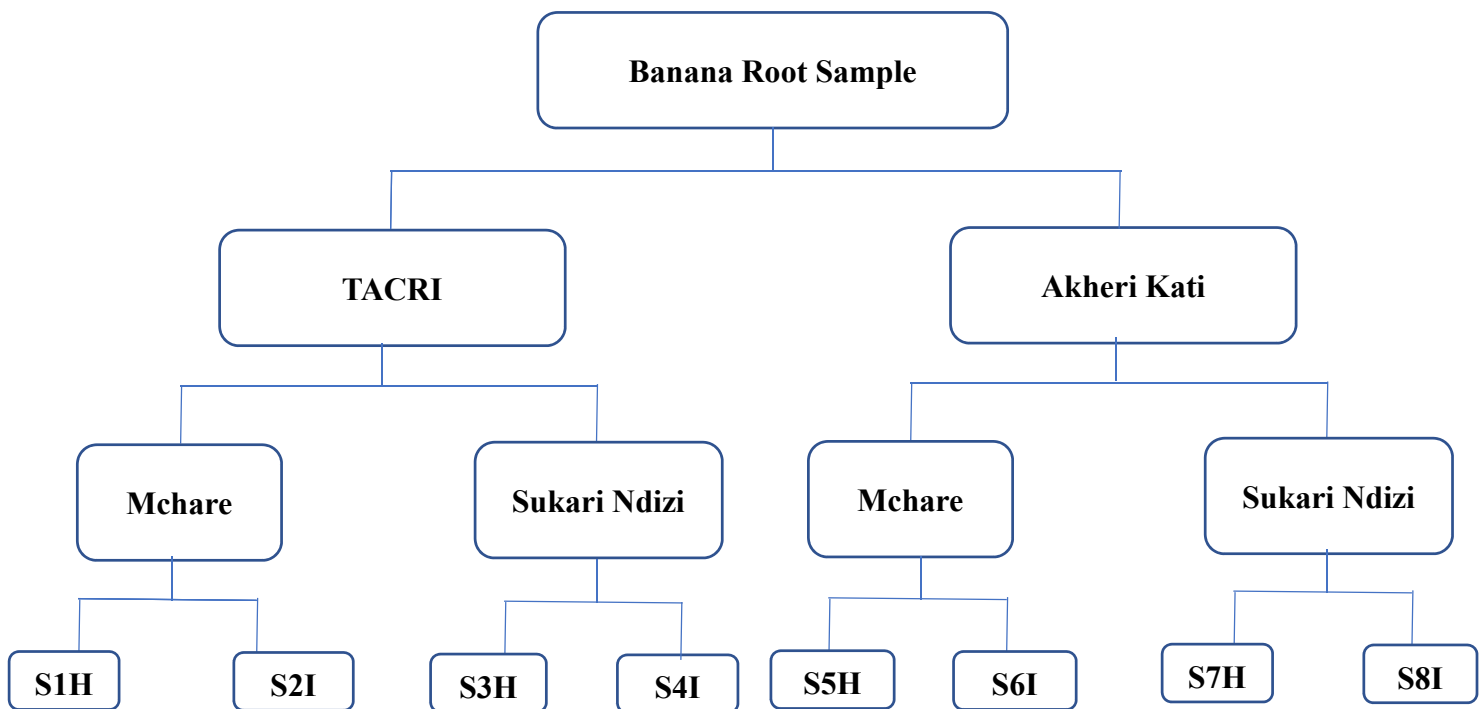

**Figure S1. Layout plan for banana root sample collection.** \*\* A total of eight banana root samples and each sample is a composite of three sub-samples.

Where: \*S: Sample; 1-8: Number; H: non symptomatic; I: symptomatic

## Supplementary Tables

**Table S1 Summary of QIIME filtration and chimeric sequences removal**

| <b>Sample</b> | <b># of Stitched Reads</b> | <b># non chimeric Reads</b> |
|---------------|----------------------------|-----------------------------|
| S1H           | 349670                     | 308784                      |
| S2I           | 381417                     | 337074                      |
| S3H           | 278606                     | 242504                      |
| S4I           | 307503                     | 281162                      |
| S5H           | 544149                     | 464508                      |
| S6I           | 457699                     | 385006                      |
| S7H           | 222216                     | 199861                      |
| S8I           | 467607                     | 414864                      |

**Table S2 Summary of clustering the similar sequences into one representative taxonomic unit as Operational Taxonomic Unit (OTU)**

| <b>Sample</b>         | <b># OTUs found</b> | <b># OTUs found (excluding singleton OTUs)</b> |
|-----------------------|---------------------|------------------------------------------------|
| S1H                   | 15426               | 6571                                           |
| S2I                   | 11779               | 5561                                           |
| S3H                   | 14909               | 6782                                           |
| S4I                   | 10044               | 5311                                           |
| S5H                   | 16699               | 7450                                           |
| S6I                   | 19223               | 8747                                           |
| S7H                   | 8243                | 4867                                           |
| S8I                   | 15901               | 7811                                           |
| total collective OTUs | 81021               | 21897                                          |

**Table S3 Summary of Beta diversity for each sample**

**Table S4 Summary of alpha diversity for each sample**

| <b>Sample</b> | <b>Shannon</b> | <b>Observed_species</b> | <b>Chao1</b> |
|---------------|----------------|-------------------------|--------------|
| S1H           | 6.88506523     | 6571                    | 9800.60656   |
| S2I           | 6.37236815     | 5561                    | 8143.76482   |
| S3H           | 7.08072462     | 6782                    | 10410.5758   |
| S4I           | 6.96542793     | 5311                    | 7038.07692   |
| S5H           | 7.3710425      | 7450                    | 10055.5672   |
| S6I           | 7.81189461     | 8747                    | 11979.4332   |
| S7H           | 7.58508533     | 4867                    | 7742.43584   |

**Abundance jaccard**

| S3H | S7H       | S4I       | S6I       | S8I       | S5H       | S1H       | S2I       |           |
|-----|-----------|-----------|-----------|-----------|-----------|-----------|-----------|-----------|
| S3H | 0         | 0.3899465 | 0.4050810 | 0.2965748 | 0.356525  | 0.2451412 | 0.3236324 | 0.2666299 |
|     |           | 4         | 5         | 9         |           | 2         | 7         | 1         |
| S7H | 0.3899465 | 0         | 0.2235025 | 0.2151700 | 0.3210178 | 0.1934823 | 0.3128651 | 0.2499867 |
|     | 4         |           | 1         | 2         | 4         | 7         | 2         | 9         |
| S4I | 0.4050810 | 0.2235025 | 0         | 0.2332282 | 0.3882529 | 0.1828573 | 0.3243133 | 0.2986206 |
|     | 5         | 1         |           | 1         | 9         | 9         | 2         | 9         |
| S6I | 0.2965748 | 0.2151700 | 0.2332282 | 0         | 0.3021491 | 0.2275766 | 0.3295316 | 0.2734919 |
|     | 9         | 2         | 1         |           | 8         | 8         | 9         | 4         |
| S8I | 0.356525  | 0.3210178 | 0.3882529 | 0.3021491 | 0         | 0.3511129 | 0.4117613 | 0.3985832 |
|     |           | 4         | 9         | 8         |           | 8         | 7         | 1         |
| S5H | 0.2451412 | 0.1934823 | 0.1828573 | 0.2275766 | 0.3511129 | 0         | 0.3139441 | 0.2266390 |
|     | 2         | 7         | 9         | 8         | 8         |           | 7         | 4         |
| S1H | 0.3236324 | 0.3128651 | 0.3243133 | 0.3295316 | 0.4117613 | 0.3139441 | 0         | 0.1894764 |
|     | 7         | 2         | 2         | 9         | 7         | 7         |           |           |
| S2I | 0.2666299 | 0.2499867 | 0.2986206 | 0.2734919 | 0.3985832 | 0.2266390 | 0.1894764 | 0         |
|     | 1         | 9         | 9         | 4         | 1         | 4         |           |           |

**Bray curtis**

|     |           |           |           |           |           |           |           |           |
|-----|-----------|-----------|-----------|-----------|-----------|-----------|-----------|-----------|
| S3H | 0         | 0.7275507 | 0.7740353 | 0.7648292 | 0.7233634 | 0.6980277 | 0.7959868 | 0.7647736 |
|     |           | 8         | 6         | 5         | 7         | 6         | 5         | 8         |
| S7H | 0.7275507 | 0         | 0.6057610 | 0.5740228 | 0.6723998 | 0.6560917 | 0.6910969 | 0.7551956 |
|     | 8         |           | 6         | 1         | 5         | 2         | 3         | 9         |
| S4I | 0.7740353 | 0.6057610 | 0         | 0.6810984 | 0.7991569 | 0.6390789 | 0.8234821 | 0.8552268 |
|     | 6         | 6         |           | 6         | 3         | 5         | 5         | 1         |
| S6I | 0.7648292 | 0.5740228 | 0.6810984 | 0         | 0.6615375 | 0.7241387 | 0.7079462 | 0.7266701 |
|     | 5         | 1         | 6         |           |           | 4         | 1         | 8         |
| S8I | 0.7233634 | 0.6723998 | 0.7991569 | 0.6615375 | 0         | 0.7704452 | 0.743378  | 0.7622889 |
|     | 7         | 5         | 3         |           |           | 7         |           | 1         |
| S5H | 0.6980277 | 0.6560917 | 0.6390789 | 0.7241387 | 0.7704452 | 0         | 0.7226455 | 0.7668710 |
|     | 6         | 2         | 5         | 4         | 7         |           | 2         | 1         |
| S1H | 0.7959868 | 0.6910969 | 0.8234821 | 0.7079462 | 0.743378  | 0.7226455 | 0         | 0.5659510 |
|     | 5         | 3         | 5         | 1         |           | 2         |           | 3         |
| S2I | 0.7647736 | 0.7551956 | 0.8552268 | 0.7266701 | 0.7622889 | 0.7668710 | 0.5659510 | 0         |
|     | 8         | 9         | 1         | 8         | 1         | 1         | 3         |           |

**Euclidean**

|     |           |            |           |           |           |           |           |           |
|-----|-----------|------------|-----------|-----------|-----------|-----------|-----------|-----------|
| S3H | 0         | 48245.834  | 67070.131 | 71066.448 | 66133.179 | 63376.784 | 65445.597 | 74114.055 |
|     |           | 2          | 7         | 7         | 3         | 4         | 3         |           |
| S7H | 48245.834 | 0          | 46510.129 | 52123.551 | 57440.680 | 52529.264 | 45892.810 | 60569.375 |
|     | 2         |            | 9         | 3         | 2         | 1         | 3         | 8         |
| S4I | 67070.131 | 46510.129  | 0         | 70761.298 | 81654.391 | 62362.377 | 69127.987 | 84169.146 |
|     | 7         | 9          |           |           | 2         | 7         | 1         | 9         |
| S6I | 71066.448 | 52123.551  | 70761.298 | 0         | 63363.711 | 75884.031 | 63475.534 | 73382.712 |
|     | 7         | 3          |           |           | 7         | 1         | 3         | 2         |
| S8I | 66133.179 | 57440.680  | 81654.391 | 63363.711 | 0         | 79203.728 | 64039.874 | 74062.368 |
|     | 3         | 2          | 2         | 7         |           |           | 8         | 5         |
| S5H | 63376.784 | 52529.264  | 62362.377 | 75884.031 | 79203.728 | 0         | 62680.007 | 74408.782 |
|     | 4         | 1          | 7         | 1         |           |           | 1         | 9         |
| S1H | 65445.597 | 45892.810  | 69127.987 | 63475.534 | 64039.874 | 62680.007 | 0         | 47359.283 |
|     | 3         | 3          | 1         | 3         | 8         | 1         |           | 6         |
| S2I | 74114.055 | 60569.375  | 84169.146 | 73382.712 | 74062.368 | 74408.782 | 47359.283 | 0         |
|     |           | 8          | 9         | 2         | 5         | 9         | 6         |           |
|     | S8I       | 7.61245204 | 7811      |           | 10539.395 |           |           |           |
